# Supplementary material for: Suppression of MET Signaling Mediated by Pitavastatin and Capmatinib Inhibits Oral and Esophageal Cancer Cell Growth
Source: Oxford University Press journal article supplement (doi:10.1158/1541-7786.mcr-20-0688), 2020-12-22
Supplement: 15417786mcr200688-sup-248903_3_supp_6759582_qkttt8.xlsx [file 15417786mcr200688-sup-248903_3_supp_6759582_qkttt8.xlsx]

## Sheet: Sheet1
	Table S1. Results of cell growth screening using an FDA-approved drug library in HOC313-LM cells.
			Cell growth ratio (vs negative control)
	Name		Replicate 1	Replicate 2	Replicate 3		Average	SD
	Pitavastatin Calcium		0.343974	0.377845	0.354743		0.358854	0.0173055
	Podofilox		0.427362	0.401889	0.387657		0.405636	0.0201156
	Colchicine		0.423744	0.425994	0.435679		0.428473	0.00634184
	Vincristine Sulfate		0.635042	0.607004	0.566422		0.602823	0.0345005
	Vinorelbine		0.633512	0.633463	0.629992		0.632322	0.00201833
	Docetaxel (Taxotere)		0.710984	0.709141	0.661281		0.693802	0.028179
	Paclitaxel (Taxol)		0.625576	0.781523	0.789607		0.732235	0.0924583
	Dactinomycin (= Actinomycin D)		0.819726	0.847784	0.72951		0.799007	0.0617996
	Idarubicin·HCl		0.891112	0.845945	0.811912		0.849656	0.0397301
	Epirubicin·HCl		0.856256	0.870205	0.85399		0.86015	0.0087812
	Vinblastine Sulfate		0.85922	0.853696	0.894866		0.869261	0.0223459
	Daunorubicin·HCl		0.869565	0.87078	0.871473		0.870606	0.000965867
	Mitoxantrone·HCl		0.868774	0.858926	0.915134		0.880945	0.0300155
	Methotrexate		0.891205	0.8845	0.877714		0.884473	0.0067455
	Gemcitabine·HCl		0.837796	0.889494	0.94621		0.891167	0.0542262
	Floxuridine		0.937631	0.852684	0.923233		0.904516	0.0454612
	Clofarabine		0.921194	0.906615	0.920945		0.916251	0.00834635
	Digoxin		0.92347	0.937467	0.933599		0.931512	0.00722796
	Topotecan·HCl		0.983123	0.930941	0.897569		0.937211	0.0431203
	Pemetrexed Disodium		0.938111	0.951481	0.956343		0.948645	0.00944119
	Mitomycin C		0.948057	0.954598	0.965517		0.956058	0.00882113
	Teniposide		0.953793	0.940998	0.979623		0.958138	0.0196755
	Topiramate		0.952272	0.966717	0.993464		0.970818	0.0208998
	Nortriptyline·HCl		0.998914	0.965221	0.954514		0.972883	0.0231704
	Thioguanine (6-Thioguanine)		0.969006	0.966717	0.984237		0.97332	0.0095234
	Cladribine		1.00822	0.931862	0.981364		0.973815	0.0387343
	Famotidine		0.969254	1.01348	0.94984		0.977525	0.0326167
	Perindopril Erbumine		0.969381	0.985831	0.978286		0.977833	0.00823422
	Doxepin·HCl		0.977534	1.00193	0.958205		0.979222	0.0219096
	Clemastine Fumarate		0.991518	0.976547	0.97539		0.981152	0.00899642
	Mycophenolic Acid		1.03605	0.964728	0.945332		0.982036	0.0477705
	Torsemide		0.953793	0.980333	1.01346		0.982528	0.0298919
	Levobunolol·HCl		0.972424	0.98251	1.00294		0.985959	0.0155492
	Everolimus		0.973875	0.993156	0.991956		0.986329	0.010802
	Moxifloxacin·HCl		0.994229	0.988747	0.976489		0.986488	0.00908286
	Ethionamide		0.986938	1.02053	0.954287		0.987252	0.0331239
	Ceftizoxim·Na		0.976256	1.00634	0.979477		0.987359	0.0165201
	Perphenazine		0.990228	0.978961	0.992914		0.987368	0.00740337
	Fluvoxamine Maleate		0.979681	0.991635	0.993526		0.98828	0.00750734
	Trihexyphenidyl·HCl		1.00121	0.975413	0.988311		0.988311	0.012898
	Epinephrine (L-(-)-Epinephrine-(+)-Bitartrate)		0.985581	1.00609	0.97539		0.989022	0.0156387
	Nateglinide		1.00933	1.02087	0.937817		0.989338	0.0449902
	Prazosin·HCl		1.01378	1.01348	0.940823		0.989362	0.0420366
	Aminophylline		1.00636	1.00018	0.961864		0.98947	0.0241064
	Nizatidine		1.00065	0.990983	0.978286		0.989973	0.011217
	Paliperidone		0.991965	0.997853	0.980114		0.989978	0.00903494
	Trandolapril		0.993345	0.975794	1.00269		0.99061	0.0136554
	Demeclocycline·HCl		1.0126	1.02154	0.937941		0.990696	0.0459056
	Brompheniramine Maleate		0.982146	1.00779	0.982284		0.990741	0.0147683
	Cloxacillin·Na		0.995068	1.03696	0.940836		0.990955	0.0481935
	Dexrazoxane		1.00091	1.00193	0.971232		0.991357	0.0174363
	Ceftibuten		0.985091	1.02809	0.961235		0.991474	0.0338839
	Mefloquine·HCl		0.991292	0.997719	0.985678		0.991563	0.00602496
	Kanamycin Sulfate		0.986938	0.994677	0.993526		0.991713	0.00417578
	Permethrin		0.986754	0.996136	0.992914		0.991934	0.0047672
	Cyclopentolate		1.0126	1.02995	0.933599		0.992051	0.0513594
	Ticlopidine·HCl		0.982612	0.994275	0.999436		0.992108	0.00861884
	Ketorolac Tromethamine		0.997097	0.974905	1.00451		0.992172	0.0154061
	Flecainide Acetate		0.994487	1.01939	0.963367		0.992415	0.0280695
	Norepinephrine Bitartrate Monohydrate		1.00785	1.00757	0.961864		0.992427	0.026469
	Phenylephrine		0.981542	0.996136	1.00023		0.992635	0.00982283
	Clavulanate Potassium		1.00237	1.01594	0.959653		0.992656	0.0293752
	Cromolyn·Na (Disodium Cromoglycate)		0.984994	0.990299	1.00313		0.992809	0.00932721
	Nevirapine		0.988491	1.00816	0.981943		0.992864	0.0136437
	Maraviroc		0.994194	0.99924	0.985678		0.993037	0.0068545
	Bortezomib		0.940321	1.01089	1.02852		0.993247	0.0466749
	Nebivolol·HCl		0.986754	1.00129	0.992914		0.993652	0.00729532
	Sulconazole Nitrate		0.98726	0.971256	1.02268		0.993733	0.0263179
	Ethambutol Dihydrochloride		1.00384	0.999124	0.978469		0.99381	0.0134924
	Pindolol		1.01378	1.00757	0.960361		0.993905	0.0292158
	Risperidone		1.00191	1.00314	0.976893		0.99398	0.014811
	Pazopanib·HCl		0.985016	1.00816	0.989257		0.994144	0.0123205
	Pilocarpine·HCl		0.994487	1.02087	0.967875		0.99441	0.0264964
	Palonosetron·HCl		1.00413	1.00816	0.970971		0.994418	0.0204056
	Clobetasol Propionate		1.00649	0.971286	1.00557		0.994447	0.0200636
	Hydroxychloroquine Sulfate		0.997097	0.990114	0.996665		0.994625	0.00391286
	Flavoxate·HCl		0.988389	0.996198	0.999804		0.994797	0.00583494
	Atropine Sulfate Monohydrate		1.02269	1.01348	0.948337		0.994836	0.0405311
	Chenodiol (Chenodeoxycholic Acid)		0.974784	1.02809	0.982284		0.995054	0.0288589
	Flucytosine		0.995646	0.997719	0.991956		0.995107	0.00291886
	Labetalol·HCl		0.969521	1.00989	1.00608		0.995163	0.0222879
	Nelarabine		1.00065	0.999571	0.9856		0.995274	0.00839537
	Quetiapine Fumarate		1.01675	1.00314	0.966372		0.995421	0.0260614
	Deferoxamine Mesylate		1.02575	1.01874	0.942283		0.995593	0.0463004
	Melphalan		1.027	0.963795	0.996119		0.995638	0.0316045
	Lactulose		0.995646	0.98403	1.00765		0.995776	0.0118111
	Dyphylline		1.02721	1.00193	0.958205		0.995782	0.0349126
	Paromomycin Sulfate		0.997177	1.00644	0.983771		0.995796	0.0113974
	(±) Isoproterenol·HCl		1.01527	1.01053	0.961864		0.995886	0.0295592
	Clomipramine·HCl		0.987763	0.980907	1.019		0.995889	0.0203039
	Imipramine·HCl		0.990034	1.02087	0.976893		0.995932	0.022573
	Deferasirox		1.0316	1.02715	0.929256		0.996002	0.0578458
	Isoniazid		0.997455	1.00166	0.988916		0.996011	0.0064946
	Travoprost		1.00856	0.981846	0.998078		0.99616	0.0134584
	Levocetirizine Dihydrochloride		1.00435	0.973384	1.01079		0.996176	0.0199993
	Colistin Sulfate		1.00676	1.00193	0.979917		0.996201	0.0143075
	Thiotepa		0.991824	0.983359	1.01346		0.996213	0.0155216
	Pantoprazole		NA	0.97628	1.01637		0.996323	0.0283452
	Estradiol		0.997698	0.97628	1.01502		0.996331	0.0194043
	Sotalol·HCl		1.03011	0.998707	0.960361		0.996393	0.0349323
	Homatropine Methylbromide		1.00145	1.00684	0.980969		0.996422	0.0136511
	Cimetidine		1.01527	1.00166	0.972384		0.996438	0.0219137
	Neomycin Sulfate		0.984994	0.991851	1.01254		0.996461	0.0143396
	Levocarnitine		0.982583	0.974905	1.03276		0.996751	0.031424
	Meclofenamate·Na		0.991292	1.00076	0.998234		0.996762	0.00490301
	Doripenem		1.00676	0.993519	0.990049		0.996775	0.00881767
	Dantrolene·Na		1.00676	1.03276	0.950968		0.996827	0.0417883
	Hydroxocobalamin·HCl		0.997097	1.0038	0.990387		0.997095	0.00670789
	Clarithromycin		0.987442	1.00375	1.00017		0.997119	0.00856868
	Raloxifene·HCl		1.01885	0.985642	0.987461		0.997319	0.0186717
	Latanoprost		0.995768	1.00737	0.989028		0.99739	0.00927928
	Capecitabine		0.973618	1.00489	1.01392		0.997477	0.0211502
	Sirolimus (Rapamycin)		1.03308	0.970637	0.988916		0.997544	0.0321026
	Pimecrolimus		0.972856	0.999571	1.02034		0.99759	0.0238055
	Daptomycin		1.00091	0.99492	0.997286		0.997707	0.00301852
	Trimethadione		0.999597	1.01411	0.98025		0.997985	0.0169861
	Trientine Dihydrochloride		0.990302	1.00151	1.00269		0.998169	0.00683801
	Sulfacetamide·Na		1.00551	0.969743	1.01961		0.998288	0.0257059
	Dasatinib		0.995068	0.997723	1.00308		0.998622	0.00407874
	Etomidate		0.995646	1.00989	0.990387		0.998639	0.0100885
	Ibutilide Fumarate		0.997097	1.00076	0.998234		0.998697	0.00187499
	Oxiconazole Nitrate		NA	0.982522	1.01502		0.998769	0.0229769
	Nitrofurantoin		1.01107	0.997853	0.987429		0.998786	0.0118507
	Maprotiline·HCl		1.01972	1.01939	0.957355		0.998822	0.0359118
	Eplerenone		0.990685	1.02154	0.984259		0.99883	0.0199327
	Piroxicam		1.01578	0.994955	0.985893		0.998875	0.0153216
	Ethinyl Estradiol		0.999452	1.01874	0.978469		0.998888	0.0201424
	Ivermectin		1.01527	0.998707	0.982904		0.99896	0.0161829
	Pimozide		0.98855	1.00757	1.00094		0.99902	0.0096551
	Hydroxyzine Dihydrochloride		0.985486	0.99924	1.01236		0.999029	0.0134382
	Rosuvastatin Calcium		1.00247	0.98941	1.00577		0.999216	0.00865086
	Theophylline		1.01464	0.980333	1.00269		0.999222	0.0174155
	Leucovorin Calcium Pentahydrate		0.997097	0.997719	1.00294		0.999253	0.00321069
	Capsaicin		0.992689	0.994955	1.01097		0.999539	0.00996579
	Hydroflumethiazide		0.994194	1.00228	1.00294		0.999806	0.00487118
	Chlorpromazine·HCl		1.04644	0.973592	0.979899		0.999976	0.0403603
	Carbidopa		0.988072	1.02755	0.984326		0.999983	0.0239481
	Mitotane		0.988491	1.01503	0.996571		1.00003	0.0136024
	Trimethobenzamide·HCl		1.01572	0.960903	1.02378		1.00013	0.0342137
	Halobetasol Propionate		0.98984	1.02053	0.990387		1.00025	0.0175645
	Meclizine Dihydrochloride		0.995646	0.994677	1.01079		1.00037	0.00903659
	Ipratropium·Br		1.01081	1.00905	0.981401		1.00042	0.0164955
	Flunisolide		1.0029	0.991635	1.00765		1.00073	0.00822643
	(S)-Timolol Maleate		0.99894	1.03121	0.972384		1.00084	0.029459
	Tropicamide		1.02417	1.00905	0.969378		1.00087	0.028299
	Dicyclomine·HCl		1.00237	1.00193	0.998733		1.00101	0.00198553
	Bendamustine·HCl		1.00571	1.01794	0.979477		1.00104	0.019653
	Levonorgestrel		1.03579	0.948814	1.01907		1.00122	0.0461512
	Fluphenazine· HCl		1.01972	1.012	0.972384		1.00137	0.0253968
	Diflunisal		1.027	0.966292	1.01232		1.00187	0.0316731
	Tranylcypromine Hemisulfate		1.02193	1.00582	0.978056		1.00194	0.022194
	Ciclopirox		1.01991	1.00893	0.977022		1.00195	0.0222788
	Azathioprine		1.00346	0.976329	1.02665		1.00215	0.0251842
	Fluoxetine·HCl		1.00485	1.00634	0.995637		1.00228	0.00579876
	Drospirenone		1.00676	1.01874	0.981364		1.00229	0.0190857
	Mepenzolate Bromide		1.01016	0.991635	1.00608		1.00263	0.00973402
	Mannitol		1.00581	1.00228	0.999804		1.00263	0.00301602
	Eptifibatide		0.997991	1.01594	0.994391		1.00277	0.0115431
	Zonisamide		1.03159	1.01496	0.961864		1.00281	0.0364194
	Clindamycin·HCl		1.05386	0.99132	0.963367		1.00285	0.0463347
	Dobutamine·HCl		0.990034	1.01644	1.00244		1.00297	0.0132089
	Phenytoin		1.00191	1.00757	0.999436		1.00297	0.00417059
	Penciclovir		NA	0.977528	1.02851		1.00302	0.0360522
	Amitriptyline·HCl		1.03725	0.963795	1.00827		1.00311	0.0370004
	Exemestane		0.998846	0.991851	1.01881		1.00317	0.0139891
	Phenoxybenzamine·HCl		0.980377	1.00582	1.02351		1.00324	0.0216828
	Salbutamol Hemisulfate		1.01972	1.03416	0.955852		1.00325	0.0416745
	Cyclophosphamide monohydrate		1.01235	0.987516	1.01097		1.00361	0.0139554
	Phenelzine Sulfate		0.991965	1.01503	1.00389		1.00363	0.0115335
	Ranitidine·HCl		1.00785	1.02973	0.973887		1.00382	0.0281393
	Isotretinoin (13-Cis-Retinoic Acid)		0.995646	1.01141	1.00451		1.00386	0.00790103
	Pentamidine Isethionate		0.993702	1.00129	1.01669		1.00389	0.0117108
	Atorvastatin Calcium		1.0116	1.01359	0.986494		1.00389	0.0151028
	Captopril		1.00654	1.03531	0.970219		1.00402	0.0326194
	Decitabine		1.03306	1.03696	0.942283		1.0041	0.0535708
	Clofazimine		1.00822	1.02715	0.977022		1.00413	0.025313
	Hydralazine·HCl		1	1.00989	1.00294		1.00428	0.00507605
	Tirofiban·HCl		1.00704	0.996974	1.00884		1.00428	0.00639474
	Levalbuterol·HCl		1.00145	0.994677	1.01707		1.0044	0.0114834
	Acetylcholine Chloride		1.03753	1.00314	0.973887		1.00485	0.031857
	Mafenide·HCl		1.00871	0.979468	1.02649		1.00489	0.023741
	Liothyronine·Na		0.997097	1.00837	1.00922		1.00489	0.00676614
	Terbinafine·HCl		1.02193	0.991851	1.00157		1.00512	0.0153511
	Amiloride·HCl·2H2O		0.994229	1.01824	1.00313		1.0052	0.0121374
	Triamcinolone Acetonide		1.02681	1.00151	0.987313		1.00521	0.0200075
	Cysteamine·HCl		1.02283	1.01594	0.977022		1.00526	0.0247001
	Ofloxacin		NA	1.00375	1.00692		1.00533	0.00224307
	Fluorouracil (5-Fluorouracil)		1.06656	0.941323	1.00827		1.00538	0.0626657
	Lapatinib Ditosylate		1.01071	1.02257	0.982885		1.00539	0.02037
	Nabumetone		1.00502	0.980025	1.03121		1.00542	0.0255964
	Amoxapine		1.03011	0.99132	0.994928		1.00545	0.02143
	Vigabatrin		0.996372	1.01572	1.00443		1.00551	0.0097182
	Metyrapone		1.00239	1.00301	1.0112		1.00553	0.00491881
	Ketoprofen		1.00962	0.999612	1.00784		1.00569	0.00533807
	Ethosuximide		0.976778	1.0327	1.00765		1.00571	0.0280114
	Atomoxetine·HCl		1.01601	1.00779	0.99351		1.00577	0.0113871
	Cefuroxime Axetil		0.995398	1.0484	0.973864		1.00589	0.0383567
	Orphenadrine Citrate		1.01674	0.990012	1.01097		1.00591	0.0140653
	Bendroflumethiazide		1.00865	1.01214	0.99772		1.00617	0.0075251
	Dipyridamole		1.005	1.01669	0.996865		1.00618	0.0099632
	Erlotinib		1.005	1.01513	0.998433		1.00619	0.00841373
	Crotamiton		1.00942	1.00375	1.00557		1.00624	0.00289621
	Lacosamide		1.00145	1.00837	1.00922		1.00635	0.00426028
	Vardenafil		1.03011	1.00757	0.981401		1.00636	0.0243769
	Tolvaptan		1.02377	0.972769	1.02268		1.00641	0.0291368
	Promethazine·HCl		0.979644	1.01939	1.02048		1.0065	0.0232679
	Clomiphene Citrate		1.00502	1.00624	1.00827		1.00651	0.00163871
	Budesonide		0.990981	1.0397	0.9893		1.00666	0.0286229
	Cycloserine		1.00237	1.05798	0.959653		1.00667	0.0493035
	Cefuroxime·Na		1.00571	1.02229	0.992107		1.0067	0.0151187
	Nepafenac		1.00586	1.00129	1.01303		1.00673	0.00591767
	Haloperidol		1.04644	1.01496	0.958858		1.00675	0.044363
	Isosorbide Dinitrate		1.00435	1.00989	1.00608		1.00677	0.00283008
	Triamterene		1.01464	0.998487	1.0073		1.00681	0.00808852
	Tiagabine·HCl		1.02529	0.984871	1.01038		1.00685	0.0204396
	Guanabenz Acetate		1.01972	1.01496	0.98591		1.00686	0.0183011
	Leflunomide		1.03139	0.985019	1.00422		1.00688	0.0233016
	Protriptyline·HCl		1.00095	0.986384	1.03345		1.00693	0.0240948
	Indinavir		0.997097	1.00837	1.0155		1.00699	0.00927808
	Cefazolin·Na		0.988036	1.0368	0.996316		1.00705	0.0260914
	Fingolimod		0.997097	0.993156	1.03119		1.00715	0.0209171
	Rifampin (Rifampicin)		1.00346	1.02755	0.990596		1.0072	0.0187597
	Amantadine·HCl		1.0212	1.02825	0.972384		1.00728	0.0304267
	Phentolamine·HCl		1.01527	1.03121	0.97539		1.00729	0.0287524
	Auranofin		0.986533	1.03221	1.00313		1.00729	0.0231194
	Duloxetine·HCl		1.04329	1.00333	0.975574		1.0074	0.0340395
	Fosphenytoin·Na Pentahydrate		1.02177	1.0038	0.996665		1.00741	0.0129365
	Aspirin (Acetylsalicylic Acid)		0.987758	1.01401	1.02119		1.00765	0.0175988
	Dienogest		1.00968	1.02154	0.992944		1.00806	0.0143696
	Cytarabine		1.01235	1.00499	1.00692		1.00809	0.00381407
	Desipramine·HCl		1.00091	1.01594	1.00742		1.00809	0.00753577
	Halcinonide		0.991292	1.01293	1.02021		1.00814	0.0150403
	Epinastine·HCl		1.0126	0.999124	1.01321		1.00831	0.00796229
	Zolmitriptan		1.02714	1.01496	0.982904		1.00833	0.0228503
	Hexachlorophene		1.00581	1.00684	1.01236		1.00834	0.00352302
	Butoconazole Nitrate		1.01164	1.00634	1.00727		1.00842	0.00282761
	Simvastatin		0.974221	1.00116	1.05016		1.00851	0.0384978
	Esomeprazole Potassium		1.03725	0.958801	1.02986		1.00864	0.043319
	Cyclobenzaprine·HCl		1.01553	1.00053	1.01031		1.00879	0.00761523
	Irinotecan·HCl		1.00435	1.00684	1.0155		1.0089	0.00584989
	Propafenone·HCl		1.00191	1.00905	1.01597		1.00898	0.00703031
	Clotrimazole		1.00237	1.05237	0.97268		1.00914	0.0402757
	Cortisone Acetate		1.00237	1.00333	1.02189		1.0092	0.0110038
	Doxapram·HCl H2O		1.01699	0.996322	1.01466		1.00932	0.011318
	Tretinoin		1.01921	1.00151	1.0073		1.00934	0.00902018
	Econazole Nitrate		1.01553	1.01033	1.00308		1.00965	0.00625322
	Meloxicam		1.03732	1.00427	0.987461		1.00968	0.0253679
	Phytonadione		0.99544	1.01331	1.02034		1.0097	0.0128386
	Etoposide		1.00346	1.03066	0.995298		1.00981	0.0185127
	Fenoprofen Calcium		1.04604	0.988764	0.99477		1.00986	0.0314807
	Metoclopramide·HCl		1.01081	1.02235	0.996431		1.00986	0.0129835
	Lopinavir		1.01306	0.987072	1.02963		1.00992	0.0214499
	Fosfomycin Calcium		1.02177	1.01141	0.996665		1.00995	0.0126165
	Danazol		1.03139	0.98377	1.01502		1.01006	0.0241955
	Dexchlorpheniramine Maleate		1.00384	1.01314	1.01321		1.01006	0.00539078
	Idoxuridine		1.01821	0.968789	1.04336		1.01012	0.0379383
	Warfarin·Na		0.999597	1.03507	0.996372		1.01035	0.0214698
	Sulfanilamide		1.01768	0.98941	1.02422		1.01044	0.0185022
	Fomepizole		1.01451	1.00837	1.00922		1.0107	0.00333048
	Olsalazine·Na		1.01976	0.997853	1.01486		1.01082	0.0114974
	Methylprednisolone		1.05044	0.973783	1.00827		1.01083	0.0383926
	Fludarabine Phosphate		1.02322	1.00837	1.00137		1.01099	0.0111578
	Desoximetasone		1.02137	1.01594	0.995839		1.01105	0.0134498
	Amlodipine		0.97576	1.01824	1.03918		1.01106	0.0323159
	Desvenlafaxine Succinate Hydrate		1.02868	1.00893	0.995839		1.01115	0.0165304
	Moexipril·HCl		1.00413	1.02362	1.00571		1.01115	0.0108228
	Anastrozole		1.01377	1.01323	1.00652		1.01117	0.00403949
	Iloperidone		0.992743	1.01749	1.02335		1.01119	0.0162447
	Fenofibrate		1.06509	0.972534	0.996119		1.01125	0.0480967
	Loperamide·HCl		1.01527	1.02825	0.990419		1.01131	0.0192253
	Methyldopa Sesquihydrate (L-Α-Methyl-Dopa Sesquihyrate)		1.03286	0.986267	1.01502		1.01138	0.0235077
	Estropipate		1.05352	0.99492	0.985707		1.01138	0.0367797
	Lidocaine·HCl·H2O		1.01675	1.00757	1.00996		1.01143	0.0047632
	Rufinamide		1.03137	0.983359	1.01961		1.01145	0.0250268
	Estramustine Phosphate·Na		1.00237	1.01314	1.019		1.0115	0.00843122
	Cetirizine HCl		0.992689	1.00893	1.03292		1.01151	0.0202371
	Mometasone Furoate		1.01976	0.989266	1.02583		1.01162	0.0195943
	Zoledronic Acid Monohydrate		1.03456	1.03269	0.967875		1.01171	0.0379723
	Darifenacin·HBr		1.00384	1.02715	1.00452		1.01184	0.0132666
	Pemirolast Potassium		0.99544	1.02705	1.01303		1.01184	0.0158388
	Tolterodine Tartrate		1.03594	0.998487	1.00115		1.01186	0.0208954
	Glycopyrrolate Iodide		1.0029	1.0251	1.00765		1.01188	0.0116856
	Galantamine·HBr		0.983455	1.04152	1.01097		1.01198	0.0290462
	Sulfamethoxazole		1.01768	0.984871	1.03345		1.012	0.0247822
	Diatrizoate Meglumine		1.00676	1.00753	1.02189		1.01206	0.00852329
	Cefdinir		0.998343	1.06	0.978074		1.01214	0.0426677
	Droperidol		1.01114	0.999124	1.02623		1.01217	0.0135844
	Desonide		1.02283	0.99492	1.019		1.01225	0.0151296
	Nefazodone·HCl		1.02846	0.982522	1.02581		1.01227	0.0257937
	Glipizide		0.99894	1.02678	1.01146		1.01239	0.0139423
	Levothyroxine·Na		1.00726	1.01141	1.01864		1.01243	0.00575987
	Cyproheptadine·HCl Sesquihydrate		1.00485	1.01359	1.01891		1.01245	0.00709821
	Guanidine·HCl		1.02322	1.01445	0.999804		1.01249	0.0118312
	Succinylcholine Chloride·2H2O		0.995344	1.02664	1.01558		1.01252	0.0158729
	Zalcitabine (2',3'-Dideoxycytidine)		1.01528	1.00499	1.01772		1.01266	0.00675224
	Fluocinolone Acetonide		1.06509	0.966292	1.00692		1.01277	0.049658
	Desloratadine		1.00795	1.00999	1.02042		1.01279	0.00668546
	Estrone		1.00942	0.991261	1.03796		1.01288	0.0235422
	Methimazole		1.02993	0.977528	1.03121		1.01289	0.0306311
	Hydroxyurea		1.01306	1.00228	1.02335		1.0129	0.0105338
	Silver Sulfadiazine		1.02073	1.00303	1.01499		1.01292	0.00903157
	Tacrine·HCl		1.005	1.03221	1.00157		1.01293	0.016787
	Cefadroxil		1.00423	1.03825	0.996316		1.01293	0.0222768
	Tetrabenazine		1.02833	0.990923	1.01961		1.01295	0.0195722
	Naphazoline·HCl		1.03432	0.972534	1.03256		1.01314	0.0351769
	Eflornithine·HCl		1.00091	0.992118	1.0465		1.01318	0.0291912
	Etonogestrel		1.01597	1.01749	1.00608		1.01318	0.0061935
	Cilostazol		1.04621	0.989315	1.00452		1.01335	0.0294565
	Aminocaproic Acid		1.02485	1.00489	1.01035		1.01336	0.010313
	Sitagliptin Phosphate		1.03442	1.00303	1.00269		1.01338	0.0182212
	Saquinavir Mesylate		1.02681	0.993949	1.01961		1.01346	0.0172735
	Alfuzosin		1.01731	1.01358	1.01097		1.01396	0.0031878
	Terconazole		1.04354	0.980333	1.01807		1.01398	0.0318034
	Dopamine·HCl		1.02137	1.01033	1.01031		1.01401	0.00637747
	Telbivudine		1.02073	0.98941	1.03191		1.01402	0.0220308
	Clonidine·HCl		1.04941	1.0253	0.967875		1.01419	0.0418848
	Gentamycin Sulfate		1.09	0.948814	1.00422		1.01434	0.0711334
	Tamoxifen Citrate		1.01843	1.01069	1.01392		1.01435	0.0038849
	Gemifloxacin		1.00435	1.02966	1.00922		1.01441	0.0134265
	Eszopiclone		1.01991	1.01314	1.01031		1.01445	0.0049313
	Tenofovir		1.02681	0.972769	1.04421		1.0146	0.0372556
	Ursodiol		1.02217	1.02378	0.997985		1.01464	0.0144504
	Oxacillin sodium salt monohydrate		NA	1.00624	1.02311		1.01468	0.0119306
	Oxcarbazepine		NA	1.00499	1.02446		1.01473	0.0137678
	Trazodone·HCl		1.02073	1.02874	0.995002		1.01482	0.0176285
	Mesna		1.02845	1.00129	1.01486		1.01486	0.0135796
	Tetrahydrozoline·HCl		1.03746	0.98941	1.01807		1.01498	0.0241734
	Indomethacin		1.005	1.03531	1.0047		1.01501	0.0175869
	Dicloxacillin·Na Salt Monohydrate		1.01553	1.00473	1.02479		1.01501	0.0100388
	Trifluoperazine· HCl		1.00962	1.01203	1.02351		1.01505	0.00742315
	Fexofenadine·HCl		1.0029	1.01901	1.02335		1.01509	0.0107723
	Clopidogrel Hydrogen Sulfate		1.02993	0.977528	1.03796		1.01514	0.0328192
	Olanzapine		0.986533	1.01824	1.04075		1.01517	0.0272391
	Tolbutamide		1.0123	1.03416	0.999436		1.0153	0.0175574
	Stavudine		1.02833	1.00908	1.00884		1.01542	0.0111853
	Loxapine Succinate		1.01887	0.994677	1.03276		1.01544	0.0192743
	Etidronate Disodium		1.04604	0.980025	1.02042		1.01549	0.0332836
	Bumetanide		1.02963	0.994955	1.02194		1.01551	0.0182094
	Pioglitazone·HCl		1.04285	1.00389	1		1.01558	0.023694
	Sodium Phenylbutyrate		1.01116	0.996508	1.03918		1.01562	0.0216853
	Mesalamine (5-Aminosalicylic Acid)		1.01836	1.03969	0.989405		1.01582	0.0252382
	Methocarbamol		0.998914	1.00301	1.04594		1.01595	0.0260514
	Cinacalcet·HCl		1.04329	1.01314	0.991496		1.01597	0.0260119
	Reserpine		1.01008	0.98941	1.04883		1.01611	0.0301637
	Ethacrynic Acid		0.992689	1.0291	1.02665		1.01615	0.0203513
	Foscarnet·Na (Sodium Phosphonoformate Tribasic Hexahydrate)		1.01306	1.0327	1.00294		1.01623	0.0151299
	Mercaptopurine Hydrate		1.01281	1.00472	1.03131		1.01628	0.0136312
	Cefaclor		0.989509	1.02374	1.03561		1.01629	0.0239374
	Olmesartan		1.00488	1.01348	1.031		1.01645	0.0133113
	Fludrocortisone Acetate		1.02322	1.02966	0.996665		1.01651	0.0174893
	Regadenoson		1.01616	1.00151	1.03191		1.01653	0.0152023
	Ezetimibe		1.00435	1.01901	1.02649		1.01662	0.0112586
	Disulfiram		1.0563	0.978777	1.01502		1.0167	0.0387889
	Minocycline		1.03579	0.958801	1.05551		1.0167	0.0511016
	Metformin·HCl		0.994229	1.01203	1.04389		1.01672	0.0251587
	Imatinib Mesylate		1.01424	1.03531	1.00157		1.01704	0.0170461
	Diclofenac·Na Salt		1.03139	0.990012	1.02986		1.01709	0.0234622
	Adefovir Dipivoxil		1.04988	1.01359	0.987897		1.01712	0.0311421
	Felodipine		0.995768	1.02755	1.02821		1.01718	0.0185444
	Fluocinonide		1.02322	1.01597	1.01236		1.01718	0.00553181
	Formoterol		1.01306	1.02966	1.00922		1.01731	0.0108614
	Sertraline·HCl		1.02681	1.00605	1.01961		1.01749	0.0105406
	Tigecycline		1.02377	1.00303	1.02576		1.01752	0.01259
	Tiopronin		1.02833	0.995461	1.02884		1.01754	0.0191248
	Paroxetine·HCl		NA	1.01873	1.01637		1.01755	0.00166934
	Calcitriol		0.995768	1.02755	1.02978		1.0177	0.0190266
	Zaleplon		1.00443	1.04313	1.00605		1.01787	0.0218895
	Dexamethasone		1.01578	1.03686	1.00157		1.01807	0.01776
	Mepivacaine·HCl		1.0537	0.99924	1.00137		1.0181	0.0308458
	Dutasteride		1.00384	1.01874	1.03202		1.0182	0.0141023
	Chlorhexidine Dihydrochloride		1.02043	1.03245	1.00193		1.01827	0.0153723
	Bupropion		0.980674	1.0803	0.994913		1.01863	0.0538796
	Quinine·HCl·H2O		1.04644	1.0253	0.984407		1.01872	0.0315351
	Nisoldipine		0.977299	1.03531	1.04389		1.01883	0.036224
	Isocarboxazid		1.01742	1.01445	1.02492		1.01893	0.00539502
	Indapamide		1.06069	0.966292	1.02986		1.01895	0.0481383
	Chlorothiazide		0.993926	1.05275	1.01035		1.01901	0.0303508
	Quinidine·HCl·H2O		1.00095	1.01664	1.0396		1.01906	0.0194383
	Isradipine		1.02177	0.988593	1.04689		1.01908	0.0292413
	Acitretin		1.00962	1.03842	1.0094		1.01915	0.0166887
	Diltiazem·HCl		1.00346	1.03531	1.01881		1.01919	0.0159283
	Malathion		1.02177	1.02357	1.01236		1.01924	0.00602165
	Verapamil·HCl		0.981916	1.03221	1.04389		1.01934	0.0329294
	Tolcapone		1.03011	0.998707	1.02949		1.01944	0.0179554
	Norethindrone		1.06656	0.970037	1.02176		1.01945	0.0483003
	Metoprolol Tartrate		1.05337	0.987516	1.01772		1.01953	0.0329646
	Darunavir		1.03306	1.02855	0.997286		1.01963	0.0194832
	Sildenafil Citrate		1.01116	1.03221	1.01567		1.01968	0.011082
	Delavirdine Mesylate		0.995768	1.04618	1.01724		1.01973	0.025297
	Nifedipine		0.992689	1.03376	1.03292		1.01979	0.0234721
	Hydrochlorothiazide		1.02032	1.01293	1.02649		1.01991	0.00678842
	Olopatadine		1.03159	0.998707	1.02949		1.01993	0.0184112
	4-Aminosalicylic Acid		0.99847	1.01167	1.04971		1.01995	0.0266068
	Doxycycline Monohydrate		1.04897	0.98377	1.02716		1.01997	0.0331921
	Irbesartan		1.02612	1.03878	0.995095		1.02	0.0224786
	Orlistat (Tetrahydrolipstatin)		1.00413	1.00816	1.04777		1.02002	0.0241192
	Dextromethorphan		1.01088	1.01124	1.03796		1.02003	0.015533
	Meropenem		1.00077	1.03113	1.02852		1.02014	0.0168291
	Febuxostat		1.02032	1.03574	1.00451		1.02019	0.0156149
	Lovastatin		0.994229	1.026	1.04075		1.02033	0.023775
	Glimepiride		1.06949	0.972534	1.01907		1.02036	0.0484884
	Erythromycin		1.00968	1.03976	1.01176		1.0204	0.0167993
	Dihydroergotamine Mesylate		1.00636	1.02087	1.034		1.02041	0.0138267
	Loteprednol Etabonate		1.01742	1.02053	1.02335		1.02043	0.00296653
	Valganciclovir·HCl		1.02056	1.01411	1.02701		1.02056	0.00644901
	Nadolol		1.03018	0.989266	1.04229		1.02058	0.0277846
	Terbutaline Hemisulfate		1.0405	0.990923	1.03037		1.0206	0.0261948
	Penicillamine (D-Penicillamine)		1.02324	1.01331	1.02583		1.02079	0.00660727
	Cephalexin Monohydrate		1.01454	1.0687	0.979477		1.0209	0.0449489
	Mupirocin		1.03366	0.992701	1.0368		1.02105	0.0246042
	Enalapril		0.969862	1.04994	1.04336		1.02105	0.044455
	Trimipramine Maleate		1.03507	1.02539	1.00282		1.02109	0.0165469
	Tadalafil		1.02529	1.00151	1.03652		1.02111	0.0178763
	Montelukast·Na		1.02655	1.01824	1.01881		1.0212	0.0046421
	Lenalidomide		1.00435	1.00076	1.05945		1.02152	0.0328942
	Niacin (Known As Vitamin B3, Nicotinic Acid And Vitamin Pp)		1.03366	1.01675	1.01486		1.02175	0.0103533
	Nilotinib		1.0215	0.996136	1.04777		1.0218	0.0258192
	Rivastigmine Tartrate		1.0153	1.04202	1.00815		1.02183	0.0178539
	Memantine·HCl		1.06573	1.03269	0.967875		1.0221	0.049781
	Repaglinide		1.0405	0.995461	1.03037		1.02211	0.0236293
	Naproxen		1.005	1.0291	1.03292		1.02234	0.0151359
	Fenoldopam Mesylate		1.08707	0.977528	1.00287		1.02249	0.0573437
	Rifabutin		1.02529	1.00605	1.03652		1.02262	0.0154107
	Donepezil·HCl		1.07019	1.00166	0.996431		1.02276	0.0411561
	Benztropine Mesylate		1.00865	1.0397	1.02017		1.02284	0.0156933
	Zileuton		0.975516	1.07782	1.01548		1.02294	0.0515582
	Oxaprozin		1.02497	1.0219	1.02217		1.02301	0.0017019
	Gemfibrozil		1.08414	0.970037	1.01502		1.02306	0.0574732
	Pyrazinamide		1.02225	1.01967	1.0273		1.02307	0.00388103
	Penicillin G Potassium (Benzylpenicillin)		1.0076	1.00472	1.05691		1.02308	0.0293373
	Difluprednate		1.01553	1.02435	1.03058		1.02348	0.00756315
	Cefpodoxime Proxetil		1.01896	1.0426	1.00895		1.0235	0.0172785
	Cefotetan Disodium		1.0219	1.04405	1.00474		1.02356	0.0197072
	Disopyramide		1.01845	1.01594	1.03637		1.02358	0.0111405
	Lisinopril·2H2O		1.04751	0.996255	1.02716		1.02364	0.0258082
	Hydrocortisone		1.05337	0.995006	1.02311		1.02383	0.0291883
	Metronidazole		1.05923	0.995006	1.01772		1.02398	0.0325674
	Propylthiouracil		1.0694	0.984871	1.01807		1.02412	0.0425897
	Doxazosin Mesylate		1.04751	0.993758	1.03121		1.02416	0.0275612
	Mifepristone		1.02658	1.02229	1.02389		1.02425	0.00216344
	Megestrol Acetate		1.01707	1.02519	1.03054		1.02427	0.00678326
	Losartan Potassium		1.03872	1.01248	1.02176		1.02432	0.0133031
	Mebendazole		1.0226	1.01248	1.03796		1.02435	0.0128282
	Ibuprofen		1.01578	1.01669	1.04075		1.0244	0.0141649
	Dinoprostone		1.00038	1.03066	1.04232		1.02445	0.0216446
	Riluzole·HCl		1.07019	1.03269	0.970881		1.02458	0.0501461
	Micafungin		1.04756	1.00472	1.02217		1.02482	0.0215392
	Ziprasidone hydrochloride		1.02701	1.0399	1.00766		1.02486	0.0162297
	Fluconazole		1.07242	0.971286	1.03121		1.02497	0.0508528
	Dapsone		1.01845	1.06499	0.991496		1.02498	0.0371769
	Pravastatin·Na		1.06028	1.01059	1.00423		1.02503	0.0306886
	Felbamate		1.09394	1.00314	0.978396		1.02516	0.0608354
	Methscopolamine Bromide ((−)-Scopolamine Methyl Bromide)		1.01107	1.01675	1.04777		1.0252	0.0197543
	Azelaic Acid		1.0219	1.0397	1.01456		1.02539	0.0129251
	Diphenhydramine·HCl		1.01824	1.012	1.04603		1.02542	0.0181142
	Tiotropium Bromide		1.00892	1.01359	1.05381		1.02544	0.0246792
	Lamivudine		1.01306	1.03574	1.02806		1.02562	0.0115341
	Testosterone Enanthate		1.03898	0.998487	1.0396		1.02569	0.0235599
	Calcipotriene		1.04361	1.02957	1.00407		1.02575	0.020043
	Sulindac		1.00689	1.02179	1.0489		1.02586	0.0213003
	Dorzolamide·HCl		1.00808	1.03686	1.03292		1.02595	0.0156042
	Cefixime		1.02485	1.0484	1.00474		1.02599	0.0218524
	Clozapine		1.00346	1.03221	1.04232		1.026	0.0201593
	Tiludronate Disodium		1.04354	1.01513	1.01961		1.02609	0.0152779
	Pyridostigmine Bromide		0.994866	1.02723	1.05652		1.0262	0.0308382
	Naltrexone·HCl		1.04941	1.02382	1.00545		1.02623	0.0220774
	Oxybutynin Chloride		1.00065	1.03049	1.04777		1.0263	0.0238368
	Nalbuphine·HCl Dihydrate		1.00636	1.02825	1.04452		1.02638	0.0191502
	Medroxyprogesterone Acetate		0.999163	1.01248	1.06766		1.02643	0.0363153
	Naftifine·HCl		1.01281	1.01159	1.05509		1.0265	0.0247661
	Rosiglitazone		1.05386	1.0386	0.987413		1.02662	0.0348037
	Pyrimethamine		1.01312	1.02874	1.03806		1.02664	0.0126031
	Loratadine		1.07535	0.977528	1.02716		1.02668	0.0489104
	Prasugrel		1.03746	1.00303	1.0396		1.0267	0.0205263
	Spectinomycin·HCl Pentahydrate		1.07761	1.00314	0.999436		1.02673	0.0441024
	Goserelin Acetate		0.986533	0.994955	1.09875		1.02674	0.0624969
	Ifosfamide		1.05483	0.985019	1.04066		1.02684	0.0369036
	Mequinol		1.03192	1.00129	1.04777		1.02699	0.0236303
	Vancomycin·HCl		1.03184	1.02056	1.02862		1.02701	0.00581306
	Dofetilide		1.00038	1.04152	1.03918		1.02703	0.0231052
	Fluticasone Propionate		1.02322	1.01597	1.04218		1.02712	0.0135348
	Rifaximin		1.05115	1.00303	1.0273		1.02716	0.0240626
	Famciclovir		1.07388	0.991261	1.01637		1.02717	0.0423559
	Amiodarone·HCl		1.05237	1.03416	0.996431		1.02766	0.0285343
	Etodolac		1.00871	1.04639	1.02806		1.02772	0.0188421
	Lincomycin·HCl		1.07167	0.995753	1.01597		1.0278	0.0393172
	Emtricitabine		1.03011	1.02382	1.02949		1.02781	0.0034661
	Furosemide		1.07974	0.968789	1.03526		1.02793	0.0558379
	Busulfan		1.0116	1.0745	0.99772		1.02794	0.0409143
	Finasteride		1.07535	0.97628	1.03256		1.02806	0.0496859
	Chlorpropamide		1.07836	1.01314	0.992944		1.02815	0.0446404
	Cefditoren Pivoxil		1.00423	1.06145	1.01877		1.02815	0.0297377
	Aminohippurate·Na		1.01307	1.0513	1.02017		1.02818	0.0203328
	Esmolol		1.01979	1.05275	1.01226		1.02826	0.0215339
	Chlorthalidone		1.03744	1.03276	1.01466		1.02828	0.0120337
	Lansoprazole		1	1.00684	1.07828		1.02838	0.0433553
	Bupivacaine·HCl		1.01571	1.0339	1.03553		1.02838	0.0109995
	Natamycin		1.01802	0.997853	1.06971		1.02853	0.0370648
	Amoxicillin		1.01979	1.03245	1.03387		1.0287	0.00775141
	Cisplatin (Cis-Diamineplatinum(Ii) Dichloride )		1.12511	1.01734	0.943731		1.02873	0.0912263
	Tazarotene		1.04811	0.995461	1.04268		1.02875	0.0289551
	Omeprazole		NA	1.00874	1.04876		1.02875	0.028299
	Betaxolol·HCl		1.02566	1.02678	1.034		1.02881	0.00452999
	Flumazenil		1.04194	1.02289	1.02194		1.02893	0.0112799
	Pancuronium·2Br		1.01824	1.01053	1.05805		1.02894	0.0255052
	Zafirlukast		1.03137	1.04669	1.00896		1.02901	0.0189743
	Cyclosporine A		1.07316	0.994275	1.02048		1.0293	0.0401738
	Fluorometholone		1.03919	1.01597	1.03276		1.02931	0.0119887
	Flurbiprofen		1.08267	0.968789	1.03661		1.02936	0.0572864
	Caffeine		1.0212	1.00166	1.06556		1.02948	0.0327446
	Rizatriptan Benzoate		1.04963	1.01059	1.02884		1.02968	0.0195335
	Carbachol (Carbamylcholine ) Chloride		1.02417	1.0386	1.02649		1.02975	0.00774591
	Mestranol		1.04582	0.994418	1.0496		1.02995	0.030826
	Hydrocortisone Acetate		1.05776	0.970037	1.06226		1.03002	0.0519949
	Ropivacaine·HCl Monohydrate		1.04202	1.02572	1.02268		1.03014	0.0104009
	Nafcillin·Na		1.03018	1.01675	1.04411		1.03035	0.0136852
	Nitazoxanide		1.00413	1.02018	1.06789		1.03073	0.0331634
	Flurandrenolide		1.03483	1.02814	1.02963		1.03087	0.00351606
	Ketoconazole		1.01116	1.06946	1.01254		1.03105	0.0332694
	Carboplatin		1.04132	1.02023	1.03178		1.03111	0.0105574
	Dexmedetomidine·HCl		1.04037	1.03416	1.019		1.03117	0.0109918
	Aminolevulinic Acid·HCl		1.04252	1.02664	1.02438		1.03118	0.00988264
	Anagrelide		1.00962	1.03221	1.05172		1.03118	0.0210712
	Carglumic Acid		1.02485	1.05565	1.01456		1.03168	0.0213797
	Tolazamide		1.06886	1.00311	1.02363		1.03187	0.0336382
	Argatroban		1.02386	1.0397	1.0322		1.03192	0.00792141
	Griseofulvin		1.0508	1.03422	1.01079		1.03194	0.0201014
	Citalopram·HBr		1.02678	1.0537	1.01548		1.03199	0.0196309
	Bromocriptine Mesylate		1.03424	1.02755	1.03448		1.03209	0.00393468
	Enalaprilat Maleate		1.05432	0.974319	1.06764		1.0321	0.0504773
	Bexarotene		1.0505	1.01323	1.0326		1.03211	0.0186387
	Granisetron·HCl		1.04897	1.03191	1.01548		1.03212	0.0167421
	Doxorubicin·HCl		1.02347	1.02289	1.05016		1.03217	0.0155761
	Valsartan		1.07054	1.01894	1.00766		1.03238	0.033523
	Mexiletine·HCl		1.07362	0.997853	1.02583		1.03243	0.0383105
	Betaine		1.0219	1.0513	1.02438		1.03253	0.0163016
	Ciprofloxacin		1.03749	1.03035	1.03015		1.03267	0.00417995
	Abacavir Sulfate		1.05872	1.02084	1.01877		1.03278	0.0224879
	Proparacaine·HCl		1.0329	1.01815	1.04729		1.03278	0.0145679
	Norfloxacin		NA	1.0362	1.02986		1.03303	0.00448405
	Apomorphine·HCl Hemihydrate		1.09097	1.02382	0.984407		1.03307	0.0538778
	Dacarbazine		1.05776	1.01998	1.02311		1.03362	0.0209704
	Butenafine·HCl		1.02193	1.0586	1.02038		1.03363	0.0216308
	Buspirone·HCl		1.04132	1.04202	1.01793		1.03376	0.0137107
	Telithromycin		1.05724	1.01059	1.03345		1.03376	0.0233241
	Levofloxacin·HCl		1.08267	0.981273	1.03796		1.03397	0.0508164
	Ondansetron		1.03065	1.0426	1.02888		1.03404	0.00746043
	Colistimethate·Na		1.05498	0.987914	1.05953		1.03414	0.0400967
	Itraconazole		1.06656	0.970037	1.06631		1.0343	0.0556529
	Azacitidine		1.03516	1.06	1.00895		1.0347	0.0255283
	Capreomycin Disulfate		1.02043	1.0658	1.01877		1.035	0.0266848
	Vorinostat		1.03749	1.02802	1.03993		1.03515	0.00629572
	Rifapentine		1.05876	1.01967	1.0273		1.03524	0.0207198
	Ropinirole·HCl		1.04811	1.01513	1.04268		1.0353	0.0176824
	Methoxsalen (Xanthotoxin)		1.01281	1.02533	1.06789		1.03534	0.0288693
	Mycophenolate Mofetil		1.04055	0.985992	1.07987		1.03547	0.0471444
	Bimatoprost		1.04252	1.0455	1.01877		1.03559	0.0146472
	Trospium Chloride		1.04635	1.01894	1.04152		1.0356	0.0146292
	Ranolazine·2HCl		1.04287	1.02374	1.04052		1.03571	0.0104292
	Propofol		1.02863	1.02825	1.05054		1.03581	0.0127579
	Brimonidine		1.02338	1.0542	1.02999		1.03586	0.0162246
	Thalidomide		1.02295	1.03113	1.05379		1.03596	0.0159752
	Bethanechol Chloride		1.01749	1.04695	1.04403		1.03615	0.016232
	Rasagiline Mesylate		1.03746	1.01967	1.0519		1.03634	0.0161469
	Albendazole		1.01836	1.03346	1.05786		1.03656	0.0199327
	Chlorzoxazone		1.06228	1.01033	1.03781		1.03681	0.0259888
	Cidofovir		1.00091	1.03276	1.0769		1.03685	0.0381565
	Tacrolimus (Fk506)		1.03594	1.01815	1.05652		1.03687	0.0191982
	Miconazole		1.08056	1.00644	1.024		1.037	0.0387347
	Tolmetin sodium dihydrate		1.06596	1.02955	1.01558		1.03703	0.0260066
	Mefenamic Acid		1.07388	0.992509	1.04471		1.03703	0.0412251
	Amrinone		1.03065	1.06	1.02057		1.03707	0.020483
	Gefitinib		1.06195	1.04773	1.00157		1.03708	0.0315668
	Metaproterenol Hemisulfate (Orciprenaline)		1.03713	1.00816	1.06606		1.03712	0.0289496
	Zanamivir		1.05925	1.03345	1.01894		1.03722	0.0204148
	Ganciclovir		1.10318	0.977528	1.03121		1.03731	0.0630479
	Gatifloxacin		1.11051	0.965044	1.03661		1.03739	0.0727345
	Gabapentin		1.02809	1.05704	1.02821		1.03778	0.0166813
	Carbinoxamine Maleate		1.01749	1.0774	1.01877		1.03788	0.0342255
	Carmustine		1.0381	1.05855	1.01737		1.038	0.0205906
	Acebutolol·HCl		1.05135	1.04405	1.01877		1.03806	0.017098
	Miglustat (N-Butyldeoxynojirimycin·HCl)		1.03337	1.03535	1.0455		1.03807	0.00651099
	Methsuximide		1.02497	1.02705	1.0624		1.03814	0.0210345
	Escitalopram		1.04963	1.02445	1.04075		1.03828	0.0127747
	Pramipexole Dihydrochloride Monohydrate		1.02448	1.05058	1.03993		1.03833	0.0131235
	Raltegravir		1.03746	1.02874	1.04883		1.03834	0.0100707
	Procainamide·HCl		1.02863	1.02087	1.06556		1.03835	0.0238831
	Rabeprazole·Na		1.03746	1.01967	1.05959		1.03891	0.0200019
	Oxytetracycline·HCl		1.02324	1.01846	1.0752		1.03897	0.03147
	Ritonavir		1.02985	1.01059	1.07651		1.03898	0.0338948
	Pentoxifylline		1.0388	1.0513	1.02722		1.0391	0.0120419
	Sulfasalazine		1.06188	1.0368	1.01891		1.03919	0.0215875
	Valproic Acid		1.05509	1.03268	1.03015		1.03931	0.0137232
	Desogestrel		1.09735	1.02154	1.00018		1.03969	0.051064
	Pentostatin		1.03366	1.03049	1.05509		1.03974	0.0133813
	Sertaconazole		1.05733	1.01979	1.04232		1.03981	0.0188947
	Cefoxitin·Na		1.03074	1.07595	1.01316		1.03995	0.0323928
	Flutamide		1.08121	0.985019	1.05416		1.04013	0.0496047
	Methenamine Hippurate		1.04929	1.03564	1.0368		1.04058	0.00757145
	Valacyclovir·HCl		1.05509	1.02809	1.03885		1.04068	0.013591
	Posaconazole		1.0405	1.03631	1.04575		1.04085	0.00473134
	Ceftazidime		1.04514	1.01556	1.06194		1.04088	0.0234794
	Imiquimod		1.06949	0.992509	1.06091		1.04097	0.0421845
	Aprepitant		1.04287	1.0368	1.04384		1.04117	0.00381822
	Thioridazine·HCl		1.05509	1.03825	1.03054		1.04129	0.0125555
	Sorafenib Tosylate		1.05876	1.03328	1.03191		1.04132	0.0151188
	Ramelteon		1.04811	1.02421	1.0519		1.04141	0.0150159
	Clindamycin Palmitate·HCl		1.02907	1.02802	1.06764		1.04158	0.0225805
	Adenosine		1.0705	1.04115	1.01456		1.04207	0.0279795
	Ceftriaxone·Na		0.999816	1.14555	0.980881		1.04208	0.0901046
	Ribavirin		1.09311	1.01794	1.01558		1.04221	0.0440964
	Midodrine·HCl		1.0684	1.01159	1.04777		1.04259	0.0287578
	Acyclovir (Acycloguanosine) Zovirax		1.05203	1.02879	1.04808		1.04297	0.0124331
	Cefprozil		1.03074	1.0571	1.04122		1.04302	0.0132707
	Bisoprolol Fumarate		1.04252	1.06145	1.02578		1.04325	0.017842
	Glyburide		1.03979	1.0428	1.04727		1.04329	0.00376541
	Oseltamivir Phosphate		1.05356	1.02023	1.05623		1.04334	0.0200573
	Dalfampridine (4-Aminopyridine)		1.09151	1.06499	0.974127		1.04354	0.0615584
	Chloramphenicol		1.03826	1.02257	1.07009		1.04364	0.0242136
	Dimenhydrinate		1.02721	1.02855	1.07545		1.04374	0.0274697
	Pamidronate Disodium Pentahydrate (Pamidronic Acid)		1.0352	1.05058	1.04645		1.04408	0.00796487
	Azithromycin		1.03137	1.03346	1.06764		1.04416	0.020366
	Nitisinone		1.03018	1.0322	1.07154		1.04464	0.0233175
	Nicardipine·HCl		1.07464	1.0253	1.034		1.04465	0.0263357
	Eprosartan Mesylate		1.05271	1.02289	1.05956		1.04506	0.0194954
	Ciclesonide		1.03598	1.00613	1.09426		1.04546	0.0448247
	Entacapone		1.06041	1.0291	1.04702		1.04551	0.0157067
	Spironolactone		1.06188	1.0542	1.02057		1.04555	0.0219717
	Atracurium Besylate		1.03596	1.03735	1.06357		1.04563	0.0155536
	Metaraminol Bitartrate		1.04408	1.00301	1.08983		1.04564	0.0434324
	Chloroquine Diphosphate		1.0505	1.02957	1.05705		1.04571	0.0143517
	Primidone		1.10287	1.02118	1.01346		1.04584	0.0495448
	Tranexamic Acid		1.03366	1.00778	1.09617		1.04587	0.0454406
	Bromfenac		1.04546	1.04115	1.05104		1.04588	0.00496248
	Oxtriphylline		1.04756	1.03736	1.05326		1.04606	0.00805653
	Carbamazepine		1.06197	1.00856	1.06764		1.04606	0.0325989
	Lamotrigine		1.02501	1.0648	1.04859		1.04613	0.0200105
	Naratriptan·HCl		1.04408	1.02018	1.0752		1.04649	0.0275886
	Nimodipine		1.0404	1.04928	1.05016		1.04661	0.00539823
	Bosentan		1.01843	1.0455	1.07708		1.047	0.0293561
	Cisatracurium Besylate		1.11635	1.01594	1.00887		1.04705	0.0601165
	Terazosin·HCl		1.08768	1.0339	1.02057		1.04738	0.0355309
	Venlafaxine·HCl		1.05238	1.0397	1.05049		1.04752	0.00684169
	Zidovudine (3'-Azido-3'-Deoxythymidine)		1.06809	1.03969	1.03504		1.04761	0.0178922
	Acamprosate		1.07639	1.02664	1.03982		1.04762	0.0257707
	Amifostine		0.993114	1.03424	1.11573		1.04769	0.062405
	Penicillin V Potassium		1.06731	1.05565	1.02057		1.04784	0.0243294
	Sumatriptan Succinate		1.02525	1.05837	1.06031		1.04797	0.0197053
	Tamsulosin·HCl		1.08089	1.031	1.0322		1.04803	0.0284655
	Fulvestrant		1.05238	1.0513	1.04052		1.04806	0.0065584
	Atazanavir		1.06427	1.0249	1.05623		1.04847	0.0208006
	Methyl Aminolevulinate·HCl		1.05624	1.02018	1.06971		1.04871	0.0256112
	Naloxone·HCl		1.04694	1.05565	1.04384		1.04881	0.00612036
	Probenecid		1.05571	1.0348	1.05652		1.04901	0.0123154
	Ramipril		1.07546	1.04115	1.03054		1.04905	0.0234792
	Aztreonam		1.04744	1.01089	1.08965		1.04933	0.0394113
	Atovaquone		1.02501	1.02755	1.09561		1.04939	0.0400483
	Praziquantel		1.06188	1.0658	1.02057		1.04942	0.0250584
	Mirtazapine		1.05624	1.01331	1.07886		1.04947	0.0332941
	Nilutamide		1.07535	1.0219	1.05143		1.04956	0.0267765
	Nystatin		NA	1.06117	1.03796		1.04957	0.0164131
	Fluvastatin·Na		1.00765	1.04747	1.09372		1.04962	0.0430768
	Biperiden·HCl		1.03074	1.07015	1.04824		1.04971	0.0197455
	Bleomycin Sulfate		1.07734	1.04773	1.02508		1.05005	0.0262066
	Ketotifen Fumarate		1.06188	1.03825	1.05049		1.05021	0.0118207
	Trimethoprim		1.07546	1.0397	1.03553		1.05023	0.021951
	Ampicillin Trihydrate		1.04514	1.03035	1.07661		1.0507	0.0236254
	Azelastine·HCl		1.09258	1.04695	1.01316		1.05089	0.0398604
	Tizanidine·HCl		1.06656	1.03686	1.05016		1.0512	0.0148769
	Misoprostol		1.06188	1.05565	1.03719		1.05157	0.0128395
	Efavirenz		1.04694	1.04115	1.06711		1.05173	0.0136285
	Propranolol·HCl		1.09447	1.0426	1.01891		1.05199	0.0386484
	Nelfinavir Mesylate		1.05645	1.0513	1.04883		1.05219	0.00388993
	Chlorpheniramine Maleate		1.0482	1.03035	1.07824		1.05226	0.0242017
	Cefotaxime Acid		1.06197	1.04358	1.05216		1.05257	0.00920401
	Pralidoxime Chloride		1.08614	1.01815	1.05344		1.05258	0.0340001
	Metaxalone		1.05103	1.01159	1.09531		1.05265	0.041884
	Rimantadine·HCl		1.0483	1.04985	1.06046		1.05287	0.00661941
	Nicotine		1.07883	1.03392	1.04594		1.0529	0.0232472
	Metolazone		1.06667	1.01159	1.08069		1.05298	0.0365227
	Alendronate·Na Trihydrate		1.03673	1.06381	1.05868		1.05307	0.0143881
	Bicalutamide		1.0635	1.04981	1.04645		1.05325	0.00903296
	Telmisartan		1.10533	1.02519	1.03054		1.05369	0.0448049
	Levetiracetam		1.02142	1.0607	1.07905		1.05373	0.029442
	Alprostadil		1.09176	1.0339	1.03553		1.05373	0.0329442
	Valproate·Na		1.02862	1.10762	1.02701		1.05441	0.0460834
	Methazolamide		1.04756	1.01503	1.1008		1.05446	0.0433009
	Amlexanox		1.11909	1.02664	1.02017		1.0553	0.0553348
	Vecuronium Bromide		1.06052	1.04985	1.05714		1.05584	0.00545658
	Arsenic Trioxide		1.08669	1.0571	1.02438		1.05606	0.0311684
	Betamethasone		1.04285	1.04669	1.07905		1.0562	0.0198878
	Didanosine		1.05815	1.03813	1.07416		1.05682	0.0180531
	Bisacodyl		1.04132	1.01868	1.11084		1.05694	0.0480277
	Temozolomide		1.08497	1.0455	1.04052		1.05699	0.0243536
	Acarbose		1.09405	1.0426	1.03561		1.05742	0.031919
	Allopurinol		1.0482	1.03891	1.08557		1.05756	0.0247001
	Tramadol·HCl		1.08632	1.0397	1.04716		1.05773	0.025045
	Miglitol		1.08751	1.02018	1.06606		1.05792	0.0343968
	Oxaliplatin		1.05203	1.02101	1.10106		1.05803	0.0403604
	(±)-Atenolol		1.05738	1.04514	1.07335		1.05862	0.0141475
	Progesterone		1.06596	1.0571	1.05381		1.05895	0.00628111
	Bacitracin		1.11761	1.0455	1.01737		1.06016	0.0517081
	Milnacipran·HCl		1.09099	1.02018	1.06971		1.06029	0.0363316
	Scopolamine·HBr		1.09719	1.0658	1.01891		1.06063	0.0393949
	Letrozole		1.00765	1.07782	1.09861		1.06136	0.0476629
	Chlorambucil		1.06427	1.0677	1.05216		1.06138	0.00816572
	Alosetron·HCl		1.10878	1.0513	1.02438		1.06149	0.0431118
	Methacholine Chloride		1.04061	1.02533	1.11909		1.06168	0.0503019
	Streptomycin Sulfate		1.09447	1.06145	1.03054		1.06215	0.0319704
	Streptozocin		1.10896	1.02572	1.0519		1.06219	0.042562
	Prednisolone		1.09855	1.06	1.02888		1.06247	0.0348985
	Voriconazole		1.08988	0.997985	1.09956		1.06247	0.0560591
	Amphotericin B		1.09258	1.0484	1.04683		1.0626	0.0259737
	Methyclothiazide		1.08751	1.02877	1.07337		1.06322	0.030661
	Tobramycin		1.07682	1.03245	1.08041		1.06322	0.0267153
	Milrinone		1.08361	1.04985	1.05714		1.06353	0.0177659
	Triptorelin Acetate		1.04591	1.08093	1.06683		1.06456	0.0176239
	Piperacillin		1.09719	1.04405	1.05547		1.06557	0.0279719
	Beclomethasone Dipropionate		1.11025	1.06	1.02719		1.06581	0.0418363
	Candesartan		1.04656	1.13931	1.01254		1.06613	0.0656137
	Carvedilol		1.10658	1.05549	1.03918		1.06709	0.0351614
	Quinapril·HCl		1.06188	1.06435	1.07708		1.06777	0.00815851
	Sulfadiazine		1.11756	1.03245	1.05381		1.06794	0.0442786
	Altretamine		1.04667	1.0607	1.0978		1.06839	0.0264171
	Tinidazole		1.09447	1.0455	1.06545		1.06847	0.0246275
	Methylergonovine Maleate		1.0823	1.03392	1.08983		1.06868	0.0303403
	Alitretinoin		1.1235	1.06	1.02438		1.06929	0.0502113
	Almotriptan		1.11467	1.05565	1.04262		1.07098	0.0383925
	Prednisone		1.0904	1.0716	1.05381		1.07194	0.0182949
	Artemether		1.13381	1.05275	1.02999		1.07218	0.05457
	Cilastatin·Na		1.07003	1.06725	1.08041		1.07256	0.00693598
	Aripiprazole		1.10812	1.04618	1.06583		1.07338	0.0316522
	Acrivastine		1.1132	1.0513	1.05806		1.07418	0.0339549
	Acetylcysteine		1.13528	1.0368	1.05245		1.07484	0.0529262
	Procarbazine·HCl		1.10941	1.06145	1.05381		1.07489	0.0301372
	Tetracycline		1.0904	1.0745	1.06046		1.07512	0.0149779
	Baclofen		1.14117	1.0513	1.0342		1.07556	0.0574641
	Cefepime·HCl Hydrate		1.12351	1.05083	1.05329		1.07588	0.0412677
	Minoxidil		1.05662	1.03502	1.1361		1.07591	0.0532333
	Amcinonide		1.10289	1.07595	1.05385		1.07756	0.0245596
	Prilocaine·HCl		1.1409	1.03177	1.06421		1.07896	0.0560415
	Acetaminophen		1.14412	1.05275	1.04262		1.07983	0.0559059
	Toremifene Base		1.12978	1.05275	1.05714		1.07989	0.043262
	Guanfacine·HCl		1.09273	1.08033	1.06897		1.08067	0.011885
	Acetohexamide		1.12498	1.05565	1.06227		1.08096	0.0382597
	Acetazolamide		1.15295	1.05275	1.03841		1.08137	0.0624052
	Benazepril·HCl		1.15001	1.0629	1.0328		1.0819	0.0608715
	Ambrisentan		1.1235	1.06725	1.05525		1.082	0.0364394
	Balsalazide		1.15443	1.05275	1.04122		1.0828	0.0622995
	Risredonic Acid		1.03749	1.09961	1.12062		1.08591	0.0432256
	Acetohydroxamic Acid		1.14265	1.06725	1.04824		1.08604	0.0499328
	Asenapine Maleate		1.15884	1.07015	1.02999		1.08633	0.0659312
	Salmeterol		1.00765	1.11518	1.13773		1.08685	0.0695125
	Dolasetron		1.05585	1.07004	1.13855		1.08815	0.0442221
	Adapalene		1.03366	1.12918	1.10269		1.08851	0.0493119
	Primaquine Phosphate		1.11756	1.07885	1.07043		1.08895	0.0251316
	Cabergoline		1.04744	1.09261	1.13692		1.09232	0.0447419
	Rocuronium Bromide		1.03213	1.10584	1.14425		1.09408	0.0569776
	Fosinopril·Na		1.03673	1.10506	1.14262		1.0948	0.0536892
	Diazoxide		1.06656	1.03191	1.18745		1.09531	0.0816575
	Imipenem		1.03443	1.08716	1.16463		1.09541	0.0654902
	Articaine·HCl		1.18093	1.06145	1.04964		1.09734	0.072633
	Lomustine		1.01836	1.11362	1.16055		1.09751	0.0724512
	Ibandronate·Na Monohydrate		1.02831	1.12296	1.15566		1.10231	0.0661404
	L-Ascorbic Acid		1.19271	1.1006	1.02859		1.1073	0.0822649
	Amikacin Disulfate		1.16326	1.089	1.08613		1.11279	0.0437291
